# Supplementary material for: Multiple Self-Healing Palmoplantar Carcinoma: A Familial Predisposition to Skin Cancer with Primary Palmoplantar and Conjunctival Lesions
Source: PubMed Central journal article supplement — J Invest Dermatol. 2014 Sep 11;135(1):304–8. doi: 10.1038/jid.2014.311 (PMC4269804; doi:10.1038/jid.2014.311), 2014-09-11
Supplement: jid2014311x1.pdf [file jid2014311x1.pdf]

## SUPPLEMENTAL DATA

# **Multiple Self-healing Palmoplantar Carcinoma (MSPC): a familial predisposition to skin cancer with primary palmoplantar and conjunctival lesions.**

Ons Mamai<sup>1,7</sup>, Lobna Boussofara<sup>2</sup>, Mohamed Denguezli<sup>2</sup>, Nathalie Escande-Beillard<sup>7</sup>, Wahiba Kraeim<sup>3</sup>, Barry Merriman<sup>4</sup>, Ilhem Ben Charfeddine<sup>1</sup>, Giovanni Stevanin<sup>5</sup>, Sana Bouraoui<sup>1</sup>, Abdelbasset Amara<sup>1</sup>, Amira Mili<sup>1</sup>, Rafiaa Nouira<sup>2</sup>, Dorra H'mida<sup>1</sup>, Badreddine Sriha<sup>6</sup>, Moez Gribaa<sup>1</sup>, Ali Saad<sup>1</sup> and Bruno Reversade<sup>7,8</sup>.

<sup>1</sup> Laboratory of Human Cytogenetic, Molecular Genetics and Reproductive Biology, Farhat Hached University Hospital, Sousse, Tunisia

<sup>2</sup> Department of Dermatology and Venerology, Farhat Hached University Hospital, Sousse, Tunisia

<sup>3</sup> Department of Dermatology and Venerology, Nabeul Regional Hospital, Nabeul, Tunisia

<sup>4</sup> Department of Human Genetics, David Geffen School of Medicine, UCLA, California, USA

<sup>5</sup> Neurogenetics team, Ecole Pratique des Hautes Etudes, heSam University and Institut du Cerveau et de la Moelle Epinière, Sorbonne University, Pitié-Salpêtrière Hospital, Paris, France

<sup>6</sup> Department of Pathological Anatomy and Cytology, Farhat Hached University Hospital, Sousse, Tunisia

<sup>7</sup> Institute of Medical Biology, Laboratory of Human Embryology and Genetics, A\*STAR, Singapore

<sup>8</sup> Department of Paediatrics, National University of Singapore, Singapore

This Supplemental data comprises 1 Figure.

**a**

| Pedigree Number | Gender | Age of Onset | Palmoplantar Lesions Number | Affected Epithelial Tissues |        |              |                      | Secondary Tumor | Aspect of Palmoplantar Lesions                | Evolution Period | Treatments         |
|-----------------|--------|--------------|-----------------------------|-----------------------------|--------|--------------|----------------------|-----------------|-----------------------------------------------|------------------|--------------------|
|                 |        |              |                             | Plantar (PA)                | Palmar | Conjunctival | Others               |                 |                                               |                  |                    |
| III:10          | M      | 25           | 10                          | +                           | +      | -            | -                    | Head & neck     | UB and V                                      | Months to years  | Surgery/Soriatane® |
| III:11          | M      | 20           | 10                          | +                           | +      | +            | Subungual lesion     | Lung            | UB and V keratinized V with depressive center | Weeks to months  | Soriatane®         |
| III:15          | F      | 10           | 10                          | +                           | +      | +            | -                    | -               | -                                             | Weeks            | -                  |
| IV:2            | M      | 5            | 15                          | +                           | +/-    | +            | -                    | Lip & Heel SCC  | UB and V                                      | Month to years   | Surgery/Soriatane® |
| IV:5            | M      | 15           | 10                          | +                           | +      | +            | Subungual lesion     | Nose SCC        | UB and V                                      | Months to years  | Surgery/Soriatane® |
| IV:8            | F      | 3            | 10                          | +                           | +/-    | -            | -                    | -               | V with depressive center                      | Months           | -                  |
| IV:9            | M      | 7            | 10                          | +                           | +      | +            | -                    | -               | UB                                            | Weeks            | Soriatane®         |
| IV:11           | M      | 3            | 15                          | +                           | +      | -            | -                    | -               | V keratinized                                 | Weeks            | Soriatane®         |
| IV:12           | F      | 1            | 15                          | +                           | +      | +            | -                    | -               | UB and V                                      | Weeks            | Surgery/Soriatane® |
| IV:13           | M      | 5            | 15                          | +                           | +      | (Bilateral)  | HKP                  | -               | V                                             | Weeks            | Soriatane®         |
| IV:14           | M      | 5            | 10                          | +                           | +      | +            | -                    | -               | V or UN                                       | Months to years  | Soriatane®         |
| IV:15           | M      | 5            | 10                          | +                           | +      | +            | -                    | -               | V or UB                                       | Weeks to years   | Soriatane®         |
| IV:16           | M      | 5            | 15                          | +                           | +      | +            | -                    | -               | V or VU                                       | Weeks            | Soriatane®         |
| IV:20           | M      | 4            | 10                          | +                           | +      | +            | Subungual lesion HKP | -               | UB and V                                      | Years            | Surgery/Soriatane® |
| V:4             | M      | 15           | 10                          | +                           | +      | +            | -                    | -               | UB and V                                      | Months           | Soriatane®         |
| Mean            |        | 8.8          | 12                          | 100%                        | 85%    | 80%          |                      |                 |                                               |                  |                    |

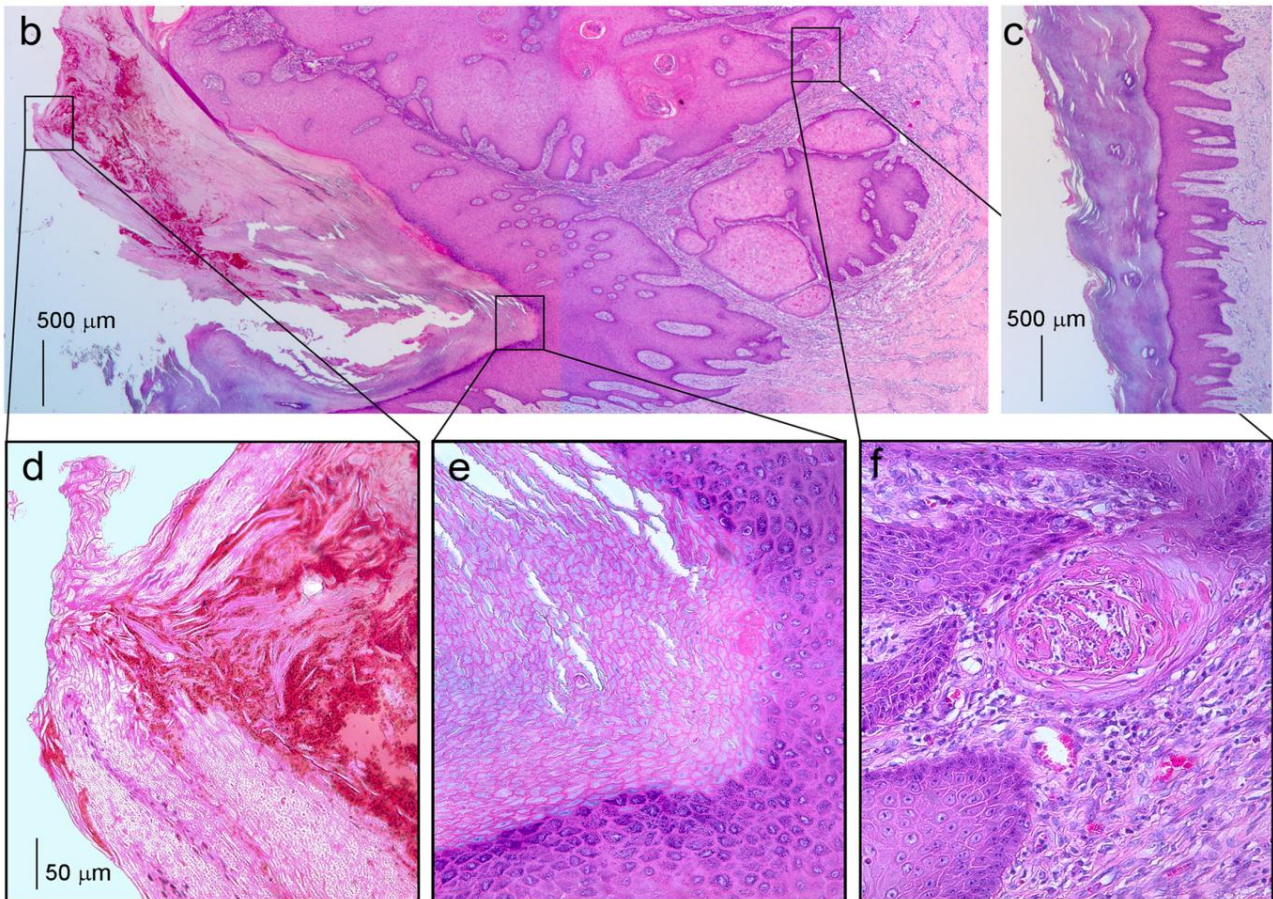

## Figure S1

### Clinical table and Histology of primary MSPC lesion.

(a) Clinical Manifestations of MSPC (M: male, F: female, PA: primary affection, HKP: Hyperkeratosis pilaris, UN: ulcerative-nodular, UB: ulcerative-burgeoning, V: verrucous, SCC: squamous cell carcinoma). (b) Histological examination of two adjoining pictures of H&E sections of a primary plantar lesion and (c) peri-lesion skin from patient IV:2. An epidermal massive hyperkeratosis overlying an endophytic squamoproliferative lesion is seen, tongues of squamous epithelium invade the dermis on a broad front. (d) keratin-filled crater. (e) Tumor cells exhibiting a pale eosinophilic cytoplasm and some eccentric pyknotic nuclei are seen, overall there was minimal cytological atypia. Detached squamous islands are present in the reticular dermis and a dense stromal inflammatory infiltrate is present at the base. (f) Central invagination filled by a mass of keratinized cell exhibiting keratin cyst formation, crypt abscesses and keratotic debris.
